# Supplementary material for: An integrated analysis of cell-type specific gene expression reveals genes regulated by REVOLUTA and KANADI1 in the Arabidopsis shoot apical meristem
Source: PLoS Genet. 2020 Apr 15;16(4):e1008661. doi: 10.1371/journal.pgen.1008661 (PMC7266345; doi:10.1371/journal.pgen.1008661)
Supplement: S15 Table — (XLSX) [file pgen.1008661.s026.xlsx]

## Sheet: S15
List of genes upregulated by REV at 16hr and down regulated by KAN1 and have enriched expression in both REV and BFP-only cells
AT1G08320
AT1G14600
AT1G16510
AT1G22570
AT1G24400
AT1G33811
AT1G65620
AT1G74890
AT1G75730
AT2G01940
AT2G02060
AT2G02061
AT2G03710
AT2G17550
AT2G21140
AT2G22800
AT2G41370
AT2G41940
AT2G44940
AT3G04290
AT3G17185
AT3G18560
AT3G20460
AT3G25670
AT3G25905
AT3G27920
AT3G43960
AT3G52340
AT3G57130
AT3G60390
AT3G61430
AT3G63210
AT4G00210
AT4G18970
AT4G24000
AT4G28780
AT4G32650
AT4G36790
AT4G37810
AT5G05690
AT5G06300
AT5G08150
AT5G23000
AT5G41410
AT5G51850
AT5G60400
AT5G64800
